Submitted to Biological Conservation

1 Patch characteristics and domestic dogs differentially affect carnivore space use in fragmented  
2 landscapes in Southern Chile

3 Rumaan Malhotra<sup>1†</sup>, Jaime E. Jiménez<sup>2</sup>, and Nyeema C. Harris<sup>1</sup>

4

5

6 <sup>1</sup>Applied Wildlife Ecology Lab, Ecology and Evolutionary Biology, University of Michigan  
7 1101 N. University Ave, Ann Arbor, Michigan 48106

8 <sup>2</sup>Advanced Environmental Research Institute, Department of Biological Sciences, University of  
9 North Texas 1155 Union Cir, Denton, Texas 76203

10

11 <sup>†</sup>[rumaanm@umich.edu](mailto:rumaanm@umich.edu)

12

13 Keywords: camera survey, *Canis lupus familiaris*, disturbance, fragmentation, invasive species,  
14 landscape, *Lycalopex*, occupancy

15

16

17

18

19

20

21

22

23

Submitted to Biological Conservation

24 **Abstract**

25 In an increasingly anthropogenic world, native species face multiple interacting threats. Habitat  
26 fragmentation and domestic dogs are two such perturbations threatening terrestrial mammals  
27 globally. Here, we implemented a camera trap survey in the fragmented central valley/Andean  
28 foothills transition of the Los Lagos Region in Southern Chile to evaluate space use of native  
29 carnivores in a landscape comprised of patches of native forest amidst a matrix of pastureland.  
30 Using an occupancy modeling framework to account for imperfect detection, we examined the  
31 impacts of dogs and landscape metrics of fragmentation on three mesocarnivores – the foxes  
32 culpeo (*Lycalopex culpaeus*) and chilla (*Lycalopex griseus*) and the wild cat güiña (*Leopardus*  
33 *guigna*). Factors driving occupancy differed for each of the native species, while detection rates  
34 for both canid species increased with dog occupancy. We found that a small (12%) simulated  
35 increase in dog occupancy negatively impacted the spatial use of the culpeo. Habitat loss and  
36 fragmentation were positive drivers for the chilla and the dog, and indirectly impacted the culpeo  
37 through the domestic dog. The güiña did not respond to fragmentation and other habitat  
38 covariates or dog occupancy. Instead, all native carnivore species temporally partitioned diel  
39 activity with dogs. We highlight that the effects of dogs or fragmentation are not ubiquitous  
40 across the carnivore guild with varied tolerance. However, future conditions of increased  
41 fragmentation and habitat loss will likely increase the potential contact between domestic dogs  
42 and native carnivores.

43

44

45

46

47

48

49

50

51

52

Submitted to Biological Conservation

53

## 54 **1. Introduction**

55 Fragmentation and habitat loss remains a global threat to biodiversity, increasing isolation  
56 between suitable habitat with emergent consequences from edge effects (Haddad et al. 2015;  
57 Pfeifer et al. 2017). These physical changes to landscapes also impact abiotic factors, altering  
58 radiation fluxes, wind patterns, and the hydrological cycle to increase heterogeneity within and  
59 across habitats (Saunders et al. 1991; Schmidt et al. 2017). Globally, 70% of forests are within 1  
60 kilometer of an edge and are becoming increasingly fragmented resulting in abundances for over  
61 85% of vertebrates being impacted by edge effects (Haddad et al. 2015; Pfeifer et al. 2017;  
62 Montibeller et al. 2020). The negative effects of fragmentation remain highly debated given  
63 idiosyncratic impacts across species and ecological interactions (Fahrig 2013; Rielly-Carroll &  
64 Freestone 2017; Fletcher et al. 2018; Fahrig et al. 2019; Harrison & Banks & Leite 2020). While  
65 species may be able to inhabit edge habitats, they may be excluded via biotic factors such as  
66 competition or predation (Michel et al. 2016). Additionally, fragmentation may interact with  
67 other factors such as habitat loss, fire prevalence, and hunting, exacerbating impacts or making it  
68 difficult to ascertain the individual drivers that alter species or interactions (Cochrane 2001;  
69 Peres 2001; Bartlett et al. 2016).

70 Domestic dogs (*Canis lupus familiaris*) represent another global threat to biodiversity as  
71 the most abundant carnivore worldwide with a global population estimated at 700 million  
72 (Hughes & Macdonald 2013). Therefore, dogs are a widespread invasive species that can  
73 commonly exploit fragmented landscapes as they more easily permeate from areas of human  
74 residence (Oehler & Litvaitis 1996; Broadbent et al. 2008; Paschoal et al. 2018). Dogs  
75 commonly harass and kill native carnivores, compete for prey species, and transmit pathogens to

Submitted to Biological Conservation

76 wild populations, threatening native carnivores (Laurenson et al. 1998; Vanak & Gompper 2009;  
77 Doherty et al. 2017). These disturbances can alter activity patterns and reduce relative abundance  
78 of native carnivores. For example, native carnivores in Madagascar exhibited spatial avoidance  
79 when domestic dogs were present, and were more likely to be replaced by dogs in degraded  
80 forests near human settlement (Farris et al. 2016, 2017). Similarly, chilla fox (*Lycalopex griseus*)  
81 visits to scent stations in Southern Chile were negatively correlated with dog presence, and  
82 telemetry data showed that foxes rested in a habitat type that was not preferred by dogs (Silva-  
83 Rodríguez et al. 2010a). In general, how dog-wildlife interactions are facilitated by habitat  
84 destruction is largely unstudied, and it is unknown whether habitat destruction and dogs have  
85 similar or opposing impacts on native carnivores, or work in concert. Given the pervasiveness of  
86 both dogs and fragmentation as major disturbances to native species, it is surprising that few  
87 studies measure and compare the synergistic effects of both.

88         The susceptibility to dog harassment/killing is largely size biased and thus, intensified for  
89 mesocarnivores. However, the impacts of fragmentation on carnivores is harder to predict  
90 because many aspects of their ecology such as prey availability, habitat quality that are also  
91 impacted. For example, a disturbance from fragmentations shuffles species distributions and  
92 facilitates the invasion of nonnative competitors or other domestic species (Crooks 2002;  
93 Echeverría et al. 2007; Jessen et al. 2018). Mammals vary in their sensitivity to fragmentation  
94 and in their adaptive responses from fragmentation (Crooks 2002; Janecka et al. 2016; Smith et  
95 al. 2019; Palmeirim et al. 2020). Large-bodied mammalian carnivores are particularly susceptible  
96 to fragmentation and edge effects due to their relatively small population sizes, slow growth rates  
97 and extended habitat requirements and corresponding home ranges (Schipper et al. 2008). The  
98 coupling of natural history characteristics, landscape structure, and anthropogenic pressures from

Submitted to Biological Conservation

99 human persecution result in carnivores, of all sizes, being among the most threatened groups of  
100 mammals worldwide (Karanth & Chellam 2009; Estes et al. 2011; Ripple et al. 2014). However,  
101 the impacts of fragmentation are less clear for mesocarnivores, many of which are generalists  
102 and have smaller home ranges than their larger counterparts, and thus may be more resistant to or  
103 even benefit from fragmentation (but see Crooks et al. 2017; Rocha et al. 2020). For example,  
104 Massara et al. (2016) found that the occupancy of generalist mesocarnivores was negatively tied  
105 to reserve size throughout the remnant patches of the Atlantic Forest in Brazil,.

106 Land owned privately by smallholders has been largely omitted from studies on native  
107 carnivores and interactions between the carnivore guild and human pressures. These  
108 understudied areas represent a later stage of the fragmentation process; rather than a contiguous  
109 protected area with an edge riddled with encroaching pastures and other human use Given the  
110 increased anthropogenic impacts in these areas, it is likely there is increased dog presence as well  
111 (Paschoal et al. 2018). These ‘working’ lands have traditionally been discounted in their value  
112 for conservation, being considered largely as the hostile matrix that native species must navigate  
113 between protected areas. However, recent findings show that patches within these agriculture-  
114 dominated lands can hold considerable biodiversity and can have high conservation value  
115 (Kremen & Merenlender 2018; Lindenmayer 2019; Wintle et al. 2019). Given the huge potential  
116 of agricultural lands for conservation, comprising a third of the ice-free land on the planet  
117 (Ramankutty et al. 2018), there is a increasing recognition that co-production of science with  
118 private landowners on working lands is necessary and perhaps unavoidable in efforts to maintain  
119 biodiversity (Naugle et al. 2020).

120 In the Valdivian temperate forests biodiversity hotspot of Chile, both fragmentation and  
121 the presence of domestic dogs are widespread and potentially devastating endemic species

Submitted to Biological Conservation

122 (Myers et al. 2000). These forests are being rapidly lost and converted to exotic plantations and  
123 pasturelands (Echeverría et al. 2008; Echeverría et al. 2012). The current conservation estate is  
124 insufficient in meeting goals to maintain the biodiversity value of these forests because protected  
125 areas are restricted to the inland Andes rather than the endemic-rich coastal areas (Smith-  
126 Ramírez 2004). The central valley, which formerly connected the coastal and montane sections  
127 as contiguous forest, has been heavily deforested and now dominated by cow pastures and exotic  
128 plantations. Today, only small patches of native forests remain as available wildlife habitat that  
129 are interspersed throughout this landscape that are privately-owned and managed (Figure 1).  
130 Free-ranging domestic dogs pose a major threat to the persistence of at least two mammal  
131 species of conservation concern, pudu (*Pudu puda*, IUCN status of Vulnerable) and Darwin's  
132 fox (*Lycalopex fulvipes*, IUCN status of Endangered) (Silva-Rodríguez et al. 2010b, 2016).

133         Here, we determine the relative consequence of fragmentation, the presence of dogs, and  
134 the interaction between the two on the spatial use of native carnivores. Specifically, we surveyed  
135 privately-owned forest patches that were outside of protected areas or forestry company  
136 ownership using remotely-triggered cameras. We expected fragmentation metrics to be more  
137 important than dog space use in explaining the occupancy of forest specialists (e.g., güiña,  
138 *Leopardus guigna*). In contrast, we also expected that in these largely altered landscapes dog  
139 occupancy would be the major driver of native canid spatial use, due to the immediate threat they  
140 present, and induced 'fear effects' (Palomares & Caro 1999; Vanak et al. 2009; Vanak &  
141 Gompper 2010). We hypothesized that increasing patch isolation and reducing the proportion of  
142 forest would be important drivers of dog occupancy, providing evidence that their presence is  
143 facilitated by fragmentation (Figure 2). Our work will enhance our understanding of native

Submitted to Biological Conservation

144 carnivore occurrence in the later stages of human-altered landscapes and reconcile the relative  
145 contributions of interacting threats from fragmentation and domestic dog presence.

146

## 147 **2. Methods**

### 148 2.1 Study area

149 We surveyed the carnivore community in the Los Lagos region of Chile, near the city of Osorno,  
150 between Lago Rupanco and Lago Llanquihue (40° 76' to 41° 21' S, 72° 54' to 72° 97' W, Figure  
151 1). This area is characterized by Valdivian temperate rain forest (mean temperature 3-23°C) with  
152 a cold, rainy winter season between May and September (1346 mm annual rainfall) and mild  
153 summers ([en.climate-data.org](http://en.climate-data.org)). The landscape, formerly dominated by native forest, is currently  
154 dominated by pastures that are used primarily for cattle as well as plantations of pine (*Pinus*  
155 *radiata*) and eucalyptus (*Eucalyptus* sp.) with small stands of native forest. The study area is  
156 relatively flat and sandwiched between a large protected area (Parque Nacional Vicente Rosales)  
157 on the eastern edge and the Osorno metropolitan area on the western edge. Native forest patches  
158 were mostly made up of degraded strips along the edges of pastures comprised of a mix of  
159 *Lophozonia obliqua*, *Nothofagus dombeyi*., *Persea lingue*, and *Laurelia sempervirens* with a  
160 bamboo understory (*Chusquea quila*).

161

### 162 2.2 Camera trap survey

163 We deployed 50 remotely-triggered cameras (Reconyx© PC 850, 850C, 900, 900C) in native  
164 forest patches throughout the study area from June to August 2019, during the austral winter. We  
165 affixed cameras to trees (minimum diameter 0.25 m) with cable locks and placed 0.5 m off the

Submitted to Biological Conservation

166 ground. We used signs of animal activity such as game trails and scat to determine the specific  
167 micro-site location of camera placement, to maximize detections. Cameras were placed at least  
168 0.5 km apart from each other, and efforts were made to place within the core of each patch if  
169 minimum spacing allowed. Each camera was baited with canned mackerel placed inside a  
170 perforated bottle, wired down to keep animals from accessing or removing the bait. Camera  
171 settings included: high sensitivity, one-second lapse between three pictures in a trigger, rapidfire  
172 (no quiet period between triggers).

173 At the end of the survey period, images were retrieved from the cameras and identified by  
174 a single observer (R. Malhotra) to the species level. After image identification, we applied a 30-  
175 minute quiet period to ensure independence of species detections (Wang et al. 2015; Suraci et al.  
176 2016). These images and the associated site-level environmental variables (explained below)  
177 were used to estimate individual species occupancy. We used Moran's I in ArcPro (vers. 2.3.1)  
178 and did not find evidence of spatial autocorrelation. The 'camtrapR' package in Program R was  
179 used to organize camera trap images and extract data for modeling.

### 180 2.3 Occupancy modeling

181 Using single-species single-season occupancy models (MacKenzie et al. 2003), we evaluated the  
182 impacts of habitat degradation on the occupancy ( $\Psi$ ) and detectability ( $p$ ) of dogs, and evaluated  
183 the impacts of habitat degradation and dog occupancy on the occupancy and detectability of  
184 three focal native species: the chilla (*Lycalopex griseus*), culpeo (*Lycalopex fulvipes*), and güiña  
185 (*Leopardus guigna*) (Figure 3). We expected that increasing habitat loss (*forest*) and patch  
186 isolation (*iso*) would reduce native carnivore occupancy, and that native species occupancy  
187 would be inversely related to dog occupancy (*dogo*). We first separated species detections into 7-  
188 day observation periods. We then modeled detection probabilities for each species holding



Submitted to Biological Conservation

189 occupancy constant, and then used the best detection models to model the occupancy for each  
190 species.

### 191 2.3.1 Detection covariates

192 We modeled detection probabilities with covariates hypothesized to influence visibility of  
193 species on camera images. We measured understory cover using a point-intercept method, with  
194 the height measured every meter for 10m in the four cardinal directions surrounding each camera  
195 (Karl et al. 2017). We then aggregated values for the understory cover into three categories: 0m  
196 (no understory), 0.01-0.25m, and 0.26-0.5m. Understory at 10m (*10uds*) is an average of all  
197 understory measurements taken every meter within a 10-meter radius of the camera tree (40  
198 measurements per camera site). We expected the understory covariate to have a negative  
199 relationship with detectability of all species, as animals passing by would be obscured by  
200 increased understory towards the height of camera placement. Understory was not included in  
201 the detection model for the culpeo, as inclusion prevented convergence of the global model. We  
202 first modeled occupancy of dogs using habitat covariates (*10uds*, *forest*, *iso*, *sm*), and then  
203 included the resulting site level estimates as the *dogo* covariate for native species models (Figure  
204 3). Patches were digitized in ArcPro (vers. 2.3.1) using high resolution satellite imagery from  
205 2018 (Maxar Vivid) to obtain proportion native forest cover (*forest*), patch isolation (*iso*) and a  
206 metric of edge effects (*edge*) estimates. Patch isolation (*iso*) was measured as the mean border-  
207 to-border distance to the nearest patch within a 1-km radius of each camera. The *edge* covariate  
208 was measured as the mean ratio of patch perimeter size to patch area for all patches within a 1-  
209 km radius of each camera. However, the edge covariate was excluded from the final global  
210 model, as it was highly correlated with both *forest* and *iso* covariates ( $p < 0.01$ ). Both *iso* and  
211 *forest* covariates were expected to have a positive relationship with native species occupancy.

Submitted to Biological Conservation

212 We estimated relative abundance of small mammals (*sm*), as a metric of prey availability, using  
213 the total number of all independent lagomorph, rodent, and shrew opossum triggers per camera  
214 standardized by the number of trap nights. Camera type (*cam*) was included to distinguish  
215 between white-flash cameras and infrared cameras with the expectation that white-flash cameras  
216 would have lower species detection despite better nighttime image quality, due to possibly  
217 startling species. Lastly, trap nights (*trap*), the number of nights an individual camera was  
218 operational to collect species detections, were included to determine if sampling effort affected  
219 detection rates. However, we expected no effect of trap nights, given similar sampling periods  
220 for all the cameras.

### 221 2.3.2 Occupancy covariates

222 Occupancy for each species was modeled with dog occupancy (*dogo*) and habitat covariates  
223 (*10uds*, *forest*, *iso*, *sm*); edge was highly correlated with *forest* and omitted from the model . To  
224 test whether the impact of dogs on native carnivores was facilitated by lack of understory, we  
225 included an interaction term between dog occupancy and average patch understory height within  
226 10m (*dogo\*10uds*). Individually, we expected dog occupancy to reduce occupancy of all native  
227 species, and for understory height to increase the occupancy of the smaller native carnivores  
228 (güiña and chilla). As an interaction term, we expected increasing understory to decrease the  
229 effect of dog occupancy on native species occupancy. We expected higher prey availability to be  
230 a positive driver of native species occupancy, but unimportant for the domestic dog, which in  
231 this area would be classified as ‘free-ranging’ by Vanak & Gompper (2010) and thus would rely  
232 on human food subsidies.

### 233 2.3.3 Model evaluation

Submitted to Biological Conservation

234 The dog global model included mean understory height within 10m (*10uds*) and camera type and  
235 trap night (*cam, trap*) covariates for detection, and understory (*10uds*), prey (*sm*), and  
236 fragmentation (*forest, iso*) for occupancy. Native species global models used the same covariates  
237 as the dog model, with the addition of dog occupancy (*dogo*) for detection, and an interaction  
238 term for dog occupancy and understory (*dogo\*10uds*) for occupancy. All detection and  
239 occupancy covariates were tested for correlation by site using Pearson's R. Model ranking was  
240 carried out using Akaike Information Criterion, corrected for small sample sizes (AICc), or  
241 quasi-AICc (QAICc) if the global model was overdispersed ( $\hat{c} > 1.2$ ), with the top model  
242 being defined as the one with the lowest AICc or QAICc score. Goodness of fit was tested for all  
243 top models ( $< 2 \Delta$  AICcs or QAICcs of the highest rank model) using a Chi-square statistic. All  
244 occupancy modeling was completed in the 'unmarked' package in Program R vers. 3.6.2.

#### 245 2.3.4. Threshold response to dogs

246 We interpreted the  $\beta$  coefficient of *dogo* and confidence intervals overlapping zero when  
247 occurring in top models to conclude significant effects of dogs on native species occupancy.  
248 When the top models included *dogo* as a covariate with a non-significant negative coefficient,  
249 we determined the threshold level of dog occupancy required for *dogo* to become a significant  
250 negative driver on native species occupancy. We incrementally increased the value of the *dogo*  
251 to the maximum occupancy value (1), a single camera at a time. The order was determined by  
252 ranking cameras from highest to lowest *dogo* value.

#### 253 2.4 Temporal use

254 As sympatric carnivores may be more likely exhibit temporal instead of spatial partitioning to  
255 promote coexistence, we estimated pairwise temporal overlaps for all species, and compared the

Submitted to Biological Conservation

256 overlap of native species pairs with the overlap of native species-dog pairs. We expected native  
257 species to have nocturnal activity patterns, dogs to have a diurnal activity pattern, and for native  
258 species to overlap more with the other native species than with domestic dogs. We plotted the  
259 temporal activity distributions of each species and determined the degree of overlap between  
260 pairs ( $\Delta$ ) with 95% confidence intervals generated by 10,000 parametric bootstrap iterations.  $\Delta$   
261 values range from 0 indicating completely distinct and non-overlapping temporal activity to 1  
262 indicating complete overlap between the comparison groups.  $\Delta_1$  was used for comparisons when  
263 one of the sample groups had less than 50 triggers; otherwise  $\Delta_4$  was used to estimate temporal  
264 overlap between species pairs (Ridout & Linkie 2009). We then used the Mardia-Watson-  
265 Wheeler test to determine if the temporal patterns varied significantly between individual  
266 species, which compares two sets of circular data and determines if there is homogeneity in the  
267 means or variances. We implemented the temporal analyses using the ‘overlap’ and ‘circular’  
268 packages in Program R.

269

### 270 **3. Results**

271 We detected all three native carnivore species over a total effort of 3500 trap-nights. Naïve  
272 occupancy estimates for the güiña (n=56 independent triggers), chilla (n = 225), and culpeo  
273 (n=39) were 0.51, 0.59, and 0.16 respectively. Domestic dogs were fairly common (n=64) found  
274 at 20/49 camera sites (naïve  $\psi = 0.41$ ). Additional native carnivores that were detected,  
275 although rare, included the chingue (*Conepatus chinga*, n=13) and the puma (*Puma concolor*,  
276 n=4). We also detected two additional non-native species: the mink (*Neovison vison*, n=20) and  
277 domestic cat (*Felis catus*, n=21). Darwin’s fox (*Lycalopex fulvipes*) was not detected during our

Submitted to Biological Conservation

278 camera survey in the area.

### 279 3.1 Detection of carnivores

280 Our study area was comprised of an understory that ranged from completely open to thickets of  
281 dense vegetation with specific camera sites comprising no understory to over two meters in  
282 height. As such, we expected detection to vary by understory, depending on species preference  
283 on microsite selection for dense vegetation, and the ability of understory to reduce the visibility  
284 range for a camera trap. For the chilla ( $\beta = -6.16$ , SE = 1.38) and dog ( $\beta = -7.44$ , SE = 1.84),  
285 *Iouds* was a strong driver of detection probability, decreasing the detectability for both species  
286 (Table S1). For both chilla ( $\beta = 1.77$ , SE = 0.37) and culpeo ( $\beta = 3.23$ , SE = 0.834), *dogo*  
287 increased detectability. The null model best described güiña detection; that is, no effect of  
288 covariates improved model fit.

### 289 3.2 Occupancy of carnivores

290 Overall, modeling occupancy with covariates and accounting for imperfect detection improved  
291 our understanding of carnivore space use. Chilla foxes had the highest overall occupancy ( $\psi =$   
292 0.67), while culpeos had the overall lowest occupancy, but nearly doubled from the naïve  
293 estimate ( $\psi = 0.36$ ). Güiña was the only species for which the null model was the best model,  
294 and the occupancy estimate was thus the same as the naïve estimate ( $\psi = 0.51$ ). In comparison to  
295 the native species, dog occupancy was higher than the culpeo and güiña, but lower than that of  
296 the chilla ( $\psi = 0.58$ ).

297 Factors driving occupancy of native carnivores varied by species (Figure 4, Table 2).

298 Despite the importance of *Iouds* for species detection, it did not appear in the best model for any  
299 species. It was however a negative driver of chilla occupancy in 4/10 top models which had

Submitted to Biological Conservation

300 comparable weight to the best model (Table 2). Given the reliance of mammalian carnivores on  
301 prey, unexpectedly, *sm* was important only for the occupancy of the culpeo ( $\beta = 1.05$ , SE =  
302 0.53).

303 We aimed to contrast the ecological consequences of habitat destruction (loss and  
304 fragmentation), and dog occurrence on the space use of native carnivores (Table 2). Habitat  
305 metrics were important drivers of chilla and dog occupancy but did not appear in the model sets  
306 for culpeo or güiña. For example, *iso* was in the top two models for the chilla ( $\beta = 0.09$ , SE =  
307 0.04), and was positively correlated with occupancy. *Forest* did not appear to be important for  
308 occupancy of any native species. We found that *forest* was however important for dogs ( $\beta = -$   
309 26.06, SE = 12.1), with increasing proportion of native forest decreasing dog occupancy. *Dogo*  
310 appeared in 4/5 top models for culpeo (including the best model) and was important for model fit  
311 for the culpeo, but was not a significant driver of culpeo occupancy ( $\beta = -4.19$ , SE = 2.74).

312 Similarly, results varied in quantifying responses of native carnivore occupancy to domestic dog  
313 presence. For chilla, *dogo* was not in the best chilla model but appeared as a positive driver in  
314 6/10 top models, which had comparable weight to the best model (Table S1). The *dogo*  
315 covariate was not influential, positive or negative, on occupancy for güiña. Culpeo was the only  
316 species with *dogo* in the top model with a negative (non-significant)  $\beta$ coefficient. The dog  
317 landscape level occupancy from the top model was 0.58. Increasing dog occupancy to 0.65 (an  
318 increase of 12.1%) resulted in *dogo* becoming a significant negative driver of culpeo occupancy  
319 (Figure S2).

320 Ultimately, we rejected our hypothesis of dog effects on native carnivores being  
321 facilitated by lack of understory. We found no evidence for the interaction of *dogo* and *10uds*  
322 affecting occupancy for native mesocarnivore species occupancy. Overall, we conclude that

Submitted to Biological Conservation

323 landscape characteristics via metrics of increasing fragmentation have similar positive effects for  
324 both generalist native carnivores and for domestic dogs (Figure 4).

### 325 3.4 Temporal activity

326 We evaluated temporal activity patterns of all of our study species to determine if there was  
327 evidence for temporal avoidance with domestic dogs. Activity patterns for the three native  
328 carnivores was largely restricted to the nocturnal and crepuscular hours. Overlap among the  
329 native carnivores was high ( $\Delta$  ranging 0.78 – 0.89) and did not vary significantly among pairs  
330 (Table S1: *p values*: 0.08-0.79). In contrast, domestic dog activity was almost entirely diurnal,  
331 resulting in significantly different activity patterns from native species ( $\Delta$  ranging 0.35-0.43;  $p <$   
332 0.001). Furthermore, 95% confidence intervals for  $\Delta$  dog-native species pairs and for  $\Delta$  native-  
333 native species pairs did not overlap in a single case, indicating that native species overlapped  
334 significantly more with other native species than they did with dogs.

335

## 336 4. Discussion

337 The threats that mammals face from habitat loss and fragmentation are especially relevant in the  
338 context of the temperate rainforests of central Chile, which have included rapid deforestation and  
339 fragmentation in the past 50 years (Echeverría et al. 2006; Nahuelhual et al. 2012; Uribe et al.  
340 2020). An additional human-related threat is the presence of domestic dogs, which antagonize  
341 native species and preferentially use the pasturelands that separate the remaining native forest  
342 patches (Silva-Rodríguez et al. 2010a). Our results from the remnant forest patches within an  
343 agricultural matrix in southern/central Chile indicate that both fragmentation and domestic dogs  
344 have differing effects on native carnivore occupancy.

Submitted to Biological Conservation

345           The effects of habitat loss and fragmentation for native carnivores are important to  
346 explore given future trends in the deforestation of the region. Our study site represents a  
347 landscape that has already undergone extensive habitat loss and fragmentation; primarily  
348 agricultural land with only remnant patches of native forest. However, even in already heavily  
349 degraded regions such as our study site, trends indicate that native forest throughout Chile  
350 continues to decline, with available habitat patches decreasing in size (Echeverría et al. 2008;  
351 Echeverría et al. 2012; Miranda et al. 2015). For the species included in this study, at first glance  
352 our results suggest that this landscape degradation does not pose an immediate concern. For the  
353 chilla, the positive correlation between patch isolation and occupancy is likely a reflection of the  
354 ecology of the fox, which primarily forages in the open fields that comprise the matrix between  
355 forest patches (Silva-Rodríguez et al. 2010a). However, this species also utilizes interior habitat  
356 of these native forest patches as a refuge, and thus, would likely have negative consequences if  
357 forest patches fell below a threshold sizes (Silva-Rodríguez et al. 2010a). Our results for culpeos  
358 and güiñas, which did not show any response to either habitat loss or patch isolation could  
359 indicate that: a) these species are plastic in their habitat requirements; b) fragmentation and  
360 habitat loss have not reached a sufficient threshold to elicit a response; c) there is a time lagged  
361 ‘extinction debt’, or d) these species are tracking spatial patterns of prey, predator, or competitor  
362 species instead (Hanski & Ovaskainen 2002; Ryall & Fahrig 2006; Swift & Hannon 2010;  
363 Halley et al. 2016). The model results for the culpeo seemed to suggest this latter mechanism, as  
364 they were positively driven by prey availability and dog occupancy was consistent in the top  
365 models having a negative coefficient (though note that it was not significant). While landscape  
366 characteristics did not appear as a negative driver in any native species models, the inverse  
367 relationship between dog occupancy and proportion of native forest means that as habitat loss



Submitted to Biological Conservation

368 increases in this region, it will likely mean less refuge habitat for native species, and higher  
369 exposure to domestic dogs (Torres & Prado 2010; Paschoal et al. 2018).

370         We expected dogs to influence native carnivore occupancy because of their documented  
371 impact on small carnivores through interference and exploitation competition, and the increased  
372 mortality risk they pose as disease reservoirs and vectors (Laurenson et al. 1998; Rhodes et al.  
373 1998; Sillero-Zubiri et al. 2004; Vanak & Gompper 2009, 2010). Dogs are potential competitors  
374 with native carnivores and have been linked to the decline of the native pudu, a potential prey  
375 item for the two fox species in this study (Silva-Rodríguez & Sieving 2012). Despite the threat  
376 that a dog encounter presents, dog occupancy did not clearly present a negative driver of native  
377 species occupancy, and only featured as a non-significant negative covariate for culpeo top  
378 models. While this partially fit our expectation that native canids would more likely have  
379 antagonistic interactions with dogs and exhibit avoidance, we expected the smaller chilla fox to  
380 be more susceptible and affected (Donadio & Buskirk 2006; Vanak & Gompper 2009). Previous  
381 studies corroborate this expectation as dogs enforce interference competition to alter space use  
382 and have been observed harassing and killing chilla (Silva-Rodríguez et al. 2010a). A lack of a  
383 negative response from chillas to dogs using an occupancy framework could indicate that foxes  
384 were avoiding dogs at finer spatial or temporal scales, or that dog density was not sufficiently  
385 high to elicit a spatial avoidance (Zapata-Ríos & Branch 2018; Qi et al. 2020). Indeed our  
386 analysis of activity patterns suggests temporal partitioning as a mechanism for avoidance of dogs  
387 (Kronfeld-Schor & Dayan 2003; Schuette et al. 2013). In contrast to chillas, culpeos did indicate  
388 a potential response to dogs at a landscape level in congruence with recent work in the Andes  
389 (Zapata-Ríos & Branch 2018). Despite the differences in the landscape histories with our study  
390 conducted in a historically contiguous forest, while the Zapata-Ríos & Branch (2018) study

Submitted to Biological Conservation

391 occurred in the historically patchy Ecuadorian Andes, we both found that culpeos could respond  
392 to dogs rather than to habitat loss and fragmentation. Congruent with their dog occupancy  
393 estimates ( $\bar{\Psi}$  = 0.66, range: 0.53 – 0.73), a projected 12% increase in dog occupancy in our study  
394 site for it to significantly reduce culpeo occupancy.

395 While dogs had opposite effects on the occupancies of the native fox species, they  
396 increased detection for both the culpeo and the chilla. Movement data for canids highlight  
397 quicker speeds through riskier areas, which would likely impact detection rates (Péron et al.  
398 2017; Broadley et al. 2019). Thus, increased detection for the fox species may reflect a finer  
399 scale response to the risk posed by domestic dogs, rather than a broader change in spatial use  
400 (Broekhuis et al. 2013).

401 Fragmentation can facilitate the spread of invasive species through numerous pathways,  
402 such as roads increasing the occurrence of dogs (Loss et al. 2013; Moreira-Arce et al. 2015). Yet,  
403 few occupancy studies have looked at the impacts of both dogs and habitat loss and  
404 fragmentation on native carnivores. Our dog occupancy model revealed that dog occupancy  
405 decreased with proportion of native forest, providing evidence for the interaction between  
406 deforestation and dogs. Whether this interaction impacts native carnivores can be intuitively  
407 answered when we see that dog occupancy can be a negative driver of culpeo occupancy when  
408 surpassing a threshold. In ‘working’ landscapes this is particularly relevant as habitat loss and  
409 dog occupancy will likely continue to increase over time. Our occupancy results suggest that the  
410 spatial use of both native fox species (indirectly in the case of the culpeo, through dog  
411 occupancy) is tied to fragmentation and habitat loss. Furthermore, this change in the landscape  
412 increases the exposure of both native foxes to the threat of a dog encounter (Farris et al. 2017,  
413 2020). In the currently remaining native forest stands that we surveyed, the largely nocturnal

Submitted to Biological Conservation

414 temporal use of native species provides a likely avoidance mechanism (Gerber et al. 2012;  
415 Shores et al. 2019). This temporal avoidance mechanism may be particularly important for  
416 generalist species such as the chilla, which our occupancy models show is similarly benefitted by  
417 habitat degradation as dogs. Future studies that investigate fragmentation on antagonistic  
418 interactions would prove beneficial to determining impacts on carnivore community structure  
419 (Magrach et al. 2014).

420         Our study gives us insight into the drivers of native carnivore space use in ‘working’  
421 landscapes rather than the protected areas that represent ideal and untouched habitats. By  
422 situating our study on privately-owned smallholder lands, we also have the unique opportunity to  
423 inform the conservation of species in these increasingly anthropogenic landscapes. Many  
424 landowners do not have access to camera traps, and thus are unlikely to encounter elusive  
425 carnivores that are present even in small patches of native forest along the edges of their  
426 pasturelands. While voluntary strategies have greater social acceptance, they are not possible  
427 without landowners first having the knowledge of what species are on their land (Kamal et al.  
428 2015). By partnering with landowners, scientists and managers can facilitate species  
429 conservation in these important landscapes which are not typically considered conservation  
430 targets (Naugle et al. 2020).

431

### 432 **Acknowledgements**

433 Our work would not have been possible without the support of the many landowners who gave  
434 us permission to place cameras on their land, including K. Konrad, C. Konrad, W. Silva, M.  
435 Hinostroza, L. Miño H. Beckhert, K. Beckhert, V. Beckhert, and G. Weisser. We thank the  
436 Applied Wildlife Ecology Lab especially N.A. Arringdale for GIS support and K.L. Mills for

Submitted to Biological Conservation

437 feedback and edits on earlier drafts, and C. Badgley, A.J. Marshall, and J. Vandermeer for  
438 assistance with study design. We appreciate field support from M.A. Lyons in helping collect  
439 data and communicate in Spanish with landowners. In addition, this work would have been  
440 impossible without the support of M. Jiménez, who generously provided logistical support  
441 throughout the field season. Finally, we would like to thank the University of Michigan Latin  
442 American and Caribbean Association and the Rackham Graduate school for funds which made  
443 the data collection possible.

444

## 445 **References**

- 446 Bartlett LJ, Newbold T, Purves DW, Tittensor DP, Harfoot MJB. 2016. Synergistic impacts of habitat loss  
447 and fragmentation on model ecosystems. *Proceedings of the Royal Society B: Biological Sciences*  
448 **283**:20161027.
- 449 Broadbent EN, Asner GP, Keller M, Knapp DE, Oliveira PJC, Silva JN. 2008. Forest fragmentation and edge  
450 effects from deforestation and selective logging in the Brazilian Amazon. *Biological Conservation*  
451 **141**:1745–1757.
- 452 Broadley K, Burton AC, Avgar T, Boutin S. 2019. Density-dependent space use affects interpretation of  
453 camera trap detection rates. *Ecology and Evolution* **9**:14031–14041.
- 454 Broekhuis F, Cozzi G, Valeix M, McNutt JW, Macdonald DW. 2013. Risk avoidance in sympatric large  
455 carnivores: reactive or predictive? *Journal of Animal Ecology* **82**:1098–1105. British Ecological  
456 Society.
- 457 Cochrane MA. 2001. Synergistic Interactions between Habitat Fragmentation and Fire in Evergreen  
458 Tropical Forests. *Conservation Biology* **15**:1515–1521.
- 459 Crooks KR. 2002. Relative Sensitivities of Mammalian Carnivores to Habitat Fragmentation. *Conservation*  
460 *Biology* **16**:488–502.
- 461 Crooks KR, Burdett CL, Theobald DM, King SRB, Di Marco M, Rondinini C, Boitani L. 2017. Quantification  
462 of habitat fragmentation reveals extinction risk in terrestrial mammals. *Proceedings of the*  
463 *National Academy of Sciences* **114**:7635–7640.
- 464 Doherty TS, Dickman CR, Glen AS, Newsome TM, Nimmo DG, Ritchie EG, Vanak AT, Wirsing AJ. 2017. The  
465 global impacts of domestic dogs on threatened vertebrates. *Biological Conservation* **210**:56–59.
- 466 Donadio E, Buskirk SW. 2006. Diet, morphology, and interspecific killing in Carnivora. *The American*  
467 *Naturalist* **167**:524–536. The University of Chicago Press.
- 468 Echeverria C, Coomes D, Salas J, Rey-Benayas JM, Lara A, Newton A. 2006. Rapid deforestation and  
469 fragmentation of Chilean Temperate Forests. *Biological Conservation* **130**:481–494.
- 470 Echeverria C, Coomes DA, Hall M, Newton AC. 2008. Spatially explicit models to analyze forest loss and  
471 fragmentation between 1976 and 2020 in southern Chile. *Ecological Modelling* **212**:439–449.
- 472 Echeverria C, Newton A, Nahuelhual L, Coomes D, Rey-Benayas JM. 2012. How landscapes change:  
473 Integration of spatial patterns and human processes in temperate landscapes of southern Chile.  
474 *Applied Geography* **32**:822–831.

Submitted to Biological Conservation

- 475 Echeverría C, Newton AC, Lara A, Benayas JMR, Coomes DA. 2007. Impacts of forest fragmentation on  
476 species composition and forest structure in the temperate landscape of southern Chile. *Global*  
477 *Ecology and Biogeography* **16**:426–439.
- 478 Estes JA et al. 2011. Trophic Downgrading of Planet Earth. *Science* **333**:301–306.
- 479 Fahrig L. 2013. Rethinking patch size and isolation effects: the habitat amount hypothesis. *Journal of*  
480 *Biogeography* **40**:1649–1663.
- 481 Fahrig L et al. 2019. Is habitat fragmentation bad for biodiversity? *Biological Conservation* **230**:179–186.
- 482 Farris ZJ, Gerber BD, Karpanty S, Murphy A, Wampole E, Ratelolahy F, Kelly MJ. 2020. Exploring and  
483 interpreting spatiotemporal interactions between native and invasive carnivores across a  
484 gradient of rainforest degradation. *Biological Invasions* **22**:2033–2047.
- 485 Farris ZJ, Gerber BD, Valenta K, Rafaliarison R, Razafimahaimodison JC, Larney E, Rajaonarivelo T,  
486 Randriana Z, Wright PC, Chapman CA. 2017. Threats to a rainforest carnivore community: A  
487 multi-year assessment of occupancy and co-occurrence in Madagascar. *Biological Conservation*  
488 **210**:116–124.
- 489 Farris ZJ, Kelly MJ, Karpanty S, Ratelolahy F. 2016. Patterns of spatial co-occurrence among native and  
490 exotic carnivores in north-eastern Madagascar. *Animal Conservation* **19**:189–198.
- 491 Fletcher RJ et al. 2018. Is habitat fragmentation good for biodiversity? *Biological Conservation* **226**:9–15.
- 492 Gerber BD, Karpanty SM, Randrianantenaina J. 2012. Activity patterns of carnivores in the rain forests of  
493 Madagascar: implications for species coexistence. *Journal of Mammalogy* **93**:667–676. Oxford  
494 Academic.
- 495 Haddad NM et al. 2015. Habitat fragmentation and its lasting impact on Earth’s ecosystems. *Science*  
496 *Advances* **1**:e1500052. American Association for the Advancement of Science.
- 497 Halley JM, Monokrousos N, Mazaris AD, Newmark WD, Vokou D. 2016. Dynamics of extinction debt  
498 across five taxonomic groups. *Nature Communications* **7**:12283. Nature Publishing Group.
- 499 Hanski I, Ovaskainen O. 2002. Extinction Debt at Extinction Threshold. *Conservation Biology* **16**:666–673.
- 500 Harrison MLK, Banks-Leite C. 2020. Edge effects on trophic cascades in tropical rainforests. *Conservation*  
501 *Biology* **34**:977–987.
- 502 Hughes J, Macdonald DW. 2013. A review of the interactions between free-roaming domestic dogs and  
503 wildlife. *Biological Conservation* **157**:341–351.
- 504 Janecka JE, Tewes ME, Davis IA, Haines AM, Caso A, Blankenship TL, Honeycutt RL. 2016. Genetic  
505 differences in the response to landscape fragmentation by a habitat generalist, the bobcat, and  
506 a habitat specialist, the ocelot. *Conservation Genetics* **17**:1093–1108.
- 507 Jessen T, Wang Y, Wilmers CC. 2018. Habitat fragmentation provides a competitive advantage to an  
508 invasive tree squirrel, *Sciurus carolinensis*. *Biological Invasions* **20**:607–618.
- 509 Jokimäki J et al. 2020. Land-sharing vs. land-sparing urban development modulate predator–prey  
510 interactions in Europe. *Ecological Applications* **30**:e02049.
- 511 Kamal S, Grodzińska-Jurczak M, Brown G. 2015. Conservation on private land: a review of global  
512 strategies with a proposed classification system. *Journal of Environmental Planning and*  
513 *Management* **58**:576–597. Routledge.
- 514 Karanth KU, Chellam R. 2009. Carnivore conservation at the crossroads. *Oryx* **43**:1.
- 515 Karl JW, McCord SE, Hadley BC. 2017. A comparison of cover calculation techniques for relating point-  
516 intercept vegetation sampling to remote sensing imagery. *Ecological Indicators* **73**:156–165.
- 517 Kremen C, Merenlender AM. 2018. Landscapes that work for biodiversity and people. *Science* **362**.  
518 American Association for the Advancement of Science. Available from  
519 <https://science.sciencemag.org/content/362/6412/eaau6020> (accessed November 2, 2020).
- 520 Kronfeld-Schor N, Dayan T. 2003. Partitioning of Time as an Ecological Resource. *Annual Review of*  
521 *Ecology, Evolution, and Systematics* **34**:153–181.

Submitted to Biological Conservation

- 522 Laurenson K, Sillero-Zubiri C, Thompson H, Shiferaw F, Thirgood S, Malcolm J. 1998. Disease as a threat  
523 to endangered species: Ethiopian wolves, domestic dogs and canine pathogens. *Animal*  
524 *Conservation* **1**:273–280.
- 525 Lindenmayer D. 2019. Small patches make critical contributions to biodiversity conservation.  
526 *Proceedings of the National Academy of Sciences* **116**:717–719.
- 527 Loss SR, Will T, Marra PP. 2013. The impact of free-ranging domestic cats on wildlife of the United  
528 States. *Nature Communications* **4**:1396. Nature Publishing Group.
- 529 MacKenzie DI, Nichols JD, Hines JE, Knutson MG, Franklin AB. 2003. Estimating Site Occupancy,  
530 Colonization, and Local Extinction When a Species Is Detected Imperfectly. *Ecology* **84**:2200–  
531 2207.
- 532 Magrath A, Laurance WF, Larrinaga AR, Santamaria L. 2014. Meta-Analysis of the Effects of Forest  
533 Fragmentation on Interspecific Interactions: Forest Fragmentation and Interspecific Interactions.  
534 *Conservation Biology* **28**:1342–1348.
- 535 Massara RL, Paschoal AMO, Bailey LL, Doherty PF, Chiarello AG. 2016. Ecological interactions between  
536 ocelots and sympatric mesocarnivores in protected areas of the Atlantic Forest, southeastern  
537 Brazil. *Journal of Mammalogy* **97**:1634–1644. Oxford Academic.
- 538 Michel VT, Jiménez-Franco MV, Naef-Daenzer B, Gruebler MU. 2016. Intraguild predator drives forest  
539 edge avoidance of a mesopredator. *Ecosphere* **7**:e01229.
- 540 Miranda A, Altamirano A, Cayuela L, Pincheira F, Lara A. 2015. Different times, same story: Native forest  
541 loss and landscape homogenization in three physiographical areas of south-central of Chile.  
542 *Applied Geography* **60**:20–28.
- 543 Montibeller B, Kmoch A, Virro H, Mander Ü, Uuemaa E. 2020. Increasing fragmentation of forest cover in  
544 Brazil's Legal Amazon from 2001 to 2017. *Scientific Reports* **10**:5803. Nature Publishing Group.
- 545 Moreira-Arce D, Vergara PM, Boutin S. 2015. Diurnal Human Activity and Introduced Species Affect  
546 Occurrence of Carnivores in a Human-Dominated Landscape. *PLoS ONE* **10**. Available from  
547 <https://www.ncbi.nlm.nih.gov/pmc/articles/PMC4569270/> (accessed May 26, 2020).
- 548 Myers N, Mittermeier RA, Mittermeier CG, Da Fonseca GA, Kent J. 2000. Biodiversity hotspots for  
549 conservation priorities. *Nature* **403**:853. Nature Publishing Group.
- 550 Nahuelhual L, Carmona A, Lara A, Echeverría C, González ME. 2012. Land-cover change to forest  
551 plantations: Proximate causes and implications for the landscape in south-central Chile.  
552 *Landscape and Urban Planning* **107**:12–20.
- 553 Naugle DE, Allred BW, Jones MO, Twidwell D, Maestas JD. 2020. Coproducing Science to Inform Working  
554 Lands: The Next Frontier in Nature Conservation. *BioScience* **70**:90–96. Oxford Academic.
- 555 Oehler JD, Litvaitis JA. 1996. The role of spatial scale in understanding responses of medium-sized  
556 carnivores to forest fragmentation. *Canadian Journal of Zoology* **74**:2070–2079. NRC Research  
557 Press.
- 558 Osorno climate: Average Temperature, weather by month, Osorno weather averages - Climate-Data.org.  
559 (n.d.). Available from [https://en.climate-data.org/south-america/chile/x-region-de-los-](https://en.climate-data.org/south-america/chile/x-region-de-los-lagos/osorno-2047/)  
560 [lagos/osorno-2047/](https://en.climate-data.org/south-america/chile/x-region-de-los-lagos/osorno-2047/) (accessed July 26, 2020).
- 561 Palmeirim AF, Santos-Filho M, Peres CA. 2020. Marked decline in forest-dependent small mammals  
562 following habitat loss and fragmentation in an Amazonian deforestation frontier. *PLOS ONE*  
563 **15**:e0230209. Public Library of Science.
- 564 Palomares F, Caro TM. 1999. Interspecific Killing among Mammalian Carnivores. *The American Naturalist*  
565 **153**:492–508. The University of Chicago Press.
- 566 Paschoal AMO, Massara RL, Bailey LL, Doherty PF, Santos PM, Paglia AP, Hirsch A, Chiarello AG. 2018.  
567 Anthropogenic Disturbances Drive Domestic Dog Use of Atlantic Forest Protected Areas. *Tropical*  
568 *Conservation Science* **11**:1940082918789833. SAGE Publications Inc.

Submitted to Biological Conservation

- 569 Peres CA. 2001. Synergistic Effects of Subsistence Hunting and Habitat Fragmentation on Amazonian  
570 Forest Vertebrates. *Conservation Biology* **15**:1490–1505.
- 571 Péron G, Fleming CH, Paula RC de, Mitchell N, Strohbach M, Leimgruber P, Calabrese JM. 2017. Periodic  
572 continuous-time movement models uncover behavioral changes of wild canids along  
573 anthropization gradients. *Ecological Monographs* **87**:442–456.
- 574 Pfeifer M et al. 2017. Creation of forest edges has a global impact on forest vertebrates. *Nature*  
575 **551**:187–191. Nature Publishing Group.
- 576 Qi J, Holyoak M, Ning Y, Jiang G. 2020. Ecological thresholds and large carnivores conservation:  
577 Implications for the Amur tiger and leopard in China. *Global Ecology and Conservation*  
578 **21**:e00837.
- 579 Ramankutty N, Mehrabi Z, Waha K, Jarvis L, Kremen C, Herrero M, Rieseberg LH. 2018. Trends in Global  
580 Agricultural Land Use: Implications for Environmental Health and Food Security. *Annual Review*  
581 *of Plant Biology* **69**:789–815.
- 582 Rhodes C, Atkinson R, Anderson R, Macdonald D. 1998. Rabies in Zimbabwe: reservoir dogs and the  
583 implications for disease control. *Philosophical Transactions of the Royal Society of London.*  
584 *Series B: Biological Sciences* **353**:999–1010. The Royal Society.
- 585 Rielly-Carroll E, Freestone AL. 2017. Habitat fragmentation differentially affects trophic levels and alters  
586 behavior in a multi-trophic marine system. *Oecologia* **183**:899–908.
- 587 Ripple WJ et al. 2014. Status and Ecological Effects of the World’s Largest Carnivores. *Science*  
588 **343**:1241484–1241484.
- 589 Rocha DG et al. 2020. Wild dogs at stake: deforestation threatens the only Amazon endemic canid, the  
590 short-eared dog (*Atelocynus microtis*). *Royal Society Open Science* **7**:190717. Royal Society.
- 591 Ryall KL, Fahrig L. 2006. Response of Predators to Loss and Fragmentation of Prey Habitat: A Review of  
592 Theory. *Ecology* **87**:1086–1093.
- 593 Saunders DA, Hobbs RJ, Margules CR. 1991. Biological Consequences of Ecosystem Fragmentation: A  
594 Review. *Conservation Biology* **5**:18–32.
- 595 Schipper J et al. 2008. The Status of the World’s Land and Marine Mammals: Diversity, Threat, and  
596 Knowledge. *Science* **322**:225–230.
- 597 Schmidt M, Jochheim H, Kersebaum K-C, Lischeid G, Nendel C. 2017. Gradients of microclimate, carbon  
598 and nitrogen in transition zones of fragmented landscapes – a review. *Agricultural and Forest*  
599 *Meteorology* **232**:659–671.
- 600 Schuette P, Wagner AP, Wagner ME, Creel S. 2013. Occupancy patterns and niche partitioning within a  
601 diverse carnivore community exposed to anthropogenic pressures. *Biological Conservation*  
602 **158**:301–312. Elsevier.
- 603 Shores CR, Dellinger JA, Newkirk ES, Kachel SM, Wirsing AJ. 2019. Mesopredators change temporal  
604 activity in response to a recolonizing apex predator. *Behavioral Ecology* **30**:1324–1335. Oxford  
605 Academic.
- 606 Sillero-Zubiri C, Hoffmann M, Macdonald DW. 2004. Canids: foxes, wolves, jackals, and dogs: status  
607 survey and conservation action plan. IUCN Gland, Switzerland.
- 608 Silva-Rodríguez E, Farias A, Moreira-Arce D, Cabello J, Hidalgo-Hermoso E, Lucherini M, Jiménez J. 2016.  
609 *Lycalopex fulvipes*. The IUCN Red List of Threatened Species 2016: e. T41586A85370871.
- 610 Silva-Rodríguez EA, Ortega-Solís GR, Jiménez JE. 2010a. Conservation and ecological implications of the  
611 use of space by chilla foxes and free-ranging dogs in a human-dominated landscape in southern  
612 Chile: INTERFERENCE OF CHILLAS FOXES BY DOGS IN CHILE. *Austral Ecology* **35**:765–777.
- 613 Silva-Rodríguez EA, Sieving KE. 2012. Domestic dogs shape the landscape-scale distribution of a  
614 threatened forest ungulate. *Biological Conservation* **150**:103–110.
- 615 Silva-Rodríguez EA, Verdugo C, Aleuy OA, Sanderson JG, Ortega-Solís GR, Osorio-Zúñiga F, González-  
616 Acuña D. 2010b. Evaluating mortality sources for the Vulnerable pudu *Pudu pudu* in Chile:

Submitted to Biological Conservation

- 617 implications for the conservation of a threatened deer. *Oryx* **44**:97–103. Cambridge University  
618 Press.
- 619 Smith JA, Duane TP, Wilmers CC. 2019. Moving through the matrix: Promoting permeability for large  
620 carnivores in a human-dominated landscape. *Landscape and Urban Planning* **183**:50–58.
- 621 Smith-Ramírez C. 2004. The Chilean coastal range: a vanishing center of biodiversity and endemism in  
622 South American temperate rainforests. *Biodiversity and Conservation* **13**:373–393.
- 623 Suraci JP, Clinchy M, Dill LM, Roberts D, Zanette LY. 2016. Fear of large carnivores causes a trophic  
624 cascade. *Nature communications* **7**:1–7. Nature Publishing Group.
- 625 Swift TL, Hannon SJ. 2010. Critical thresholds associated with habitat loss: a review of the concepts,  
626 evidence, and applications. *Biological Reviews* **85**:35–53.
- 627 Torres Pc, Prado Pi. 2010. Domestic dogs in a fragmented landscape in the Brazilian Atlantic Forest:  
628 abundance, habitat use and caring by owners. *Brazilian Journal of Biology* **70**:987–994.
- 629 Uribe SV, Estades CF, Radeloff VC. 2020. Pine plantations and five decades of land use change in central  
630 Chile. *PLOS ONE* **15**:e0230193. Public Library of Science.
- 631 Vanak AT, Gompper ME. 2009. Dogs *Canis familiaris* as carnivores: their role and function in intraguild  
632 competition. *Mammal Review* **39**:265–283.
- 633 Vanak AT, Gompper ME. 2010. Interference competition at the landscape level: the effect of free-  
634 ranging dogs on a native mesocarnivore. *Journal of Applied Ecology* **47**:1225–1232.
- 635 Vanak AT, Thaker M, Gompper ME. 2009. Experimental examination of behavioural interactions  
636 between free-ranging wild and domestic canids. *Behavioral Ecology and Sociobiology* **64**:279–  
637 287.
- 638 Wang Y, Allen ML, Wilmers CC. 2015. Mesopredator spatial and temporal responses to large predators  
639 and human development in the Santa Cruz Mountains of California. *Biological Conservation*  
640 **190**:23–33. Elsevier.
- 641 Wintle BA et al. 2019. Global synthesis of conservation studies reveals the importance of small habitat  
642 patches for biodiversity. *Proceedings of the National Academy of Sciences* **116**:909–914.
- 643 Zapata-Ríos G, Branch LC. 2018. Mammalian carnivore occupancy is inversely related to presence of  
644 domestic dogs in the high Andes of Ecuador. *PLOS ONE* **13**:e0192346.
- 645



Submitted to Biological Conservation

## Figure Legends

Figure 1. a) Study area located in the Los Lagos Region of south-eastern Chile. b) Landscape level distribution of camera deployment throughout patches of native forest straddling the Volcano Osorno.

Figure 2. Hypothesized facilitation of dog occupancy by habitat loss and fragmentation with expectation that decreasing proportion of native forest and increasing patch isolation would promote higher dog occupancy. Expectations for native carnivore response to fragmentation were opposite those of domestic dogs, with native carnivore occupancy expected to decrease with decreasing forest and increasing patch isolation.

Figure 3. Focal carnivores in study for size comparison of the three native species relative to and domestic dogs: the güiña, chilla, domestic dog, and culpeo from top left clockwise. Note that the upper weight range of the culpeo likely represents more southern parts of the range than the study area; they are relatively bigger than chillas, and smaller than dogs. Photo credit: Applied Wildlife Ecology Lab.

Figure 4. Relative importance of each covariate on species occupancy based on summed model weights for top model sets ( $< 2 \Delta AIC/QAIC$ ). Positive (+) and negative (-) signs correspond to the direction of beta coefficients from each model set, and were consistent within top model sets.

Submitted to Biological Conservation

Figure 1.

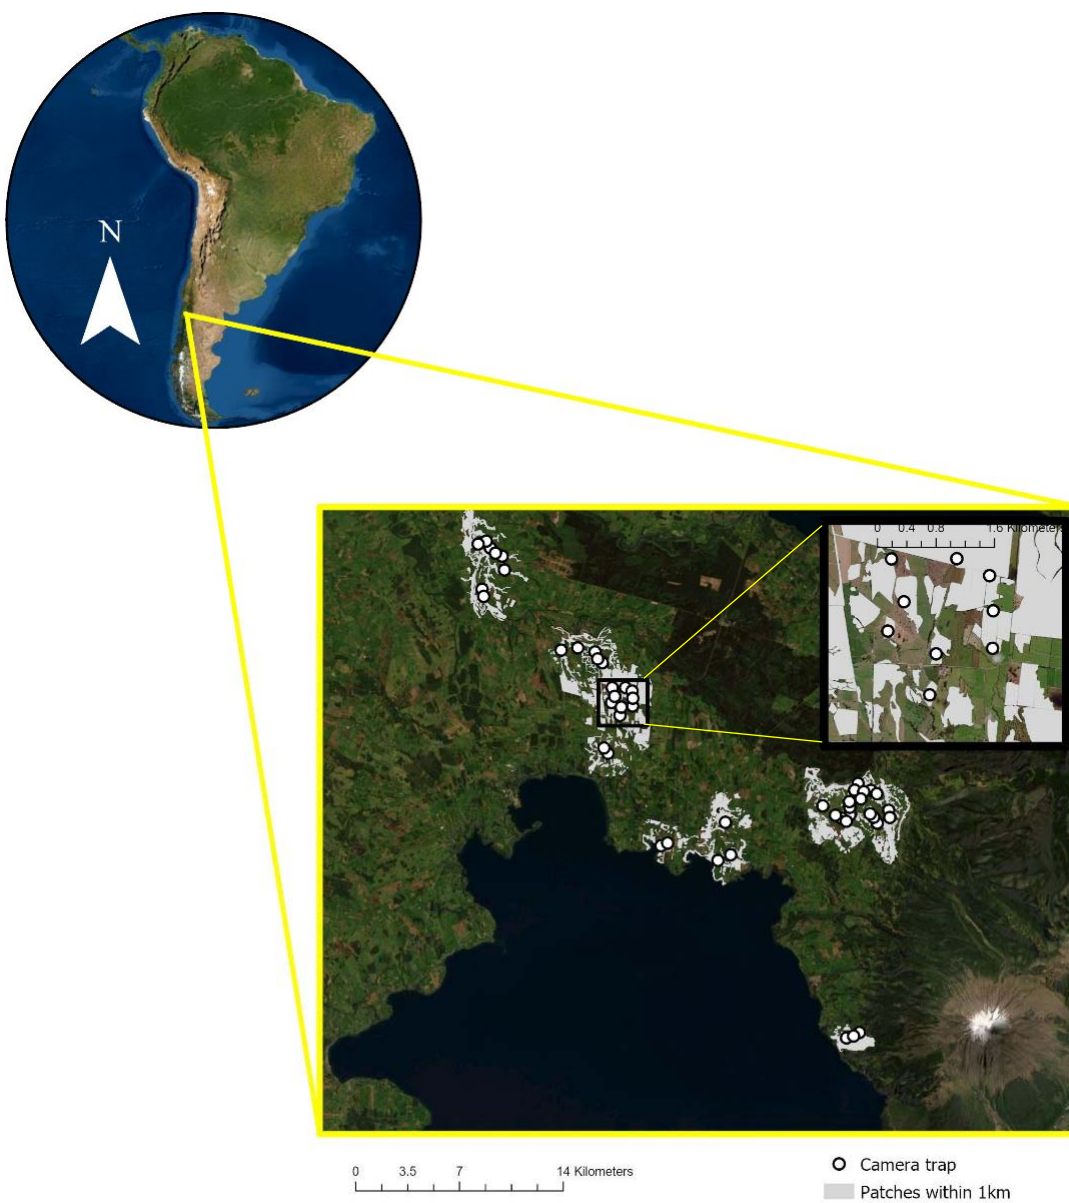

Submitted to Biological Conservation

Figure 2.

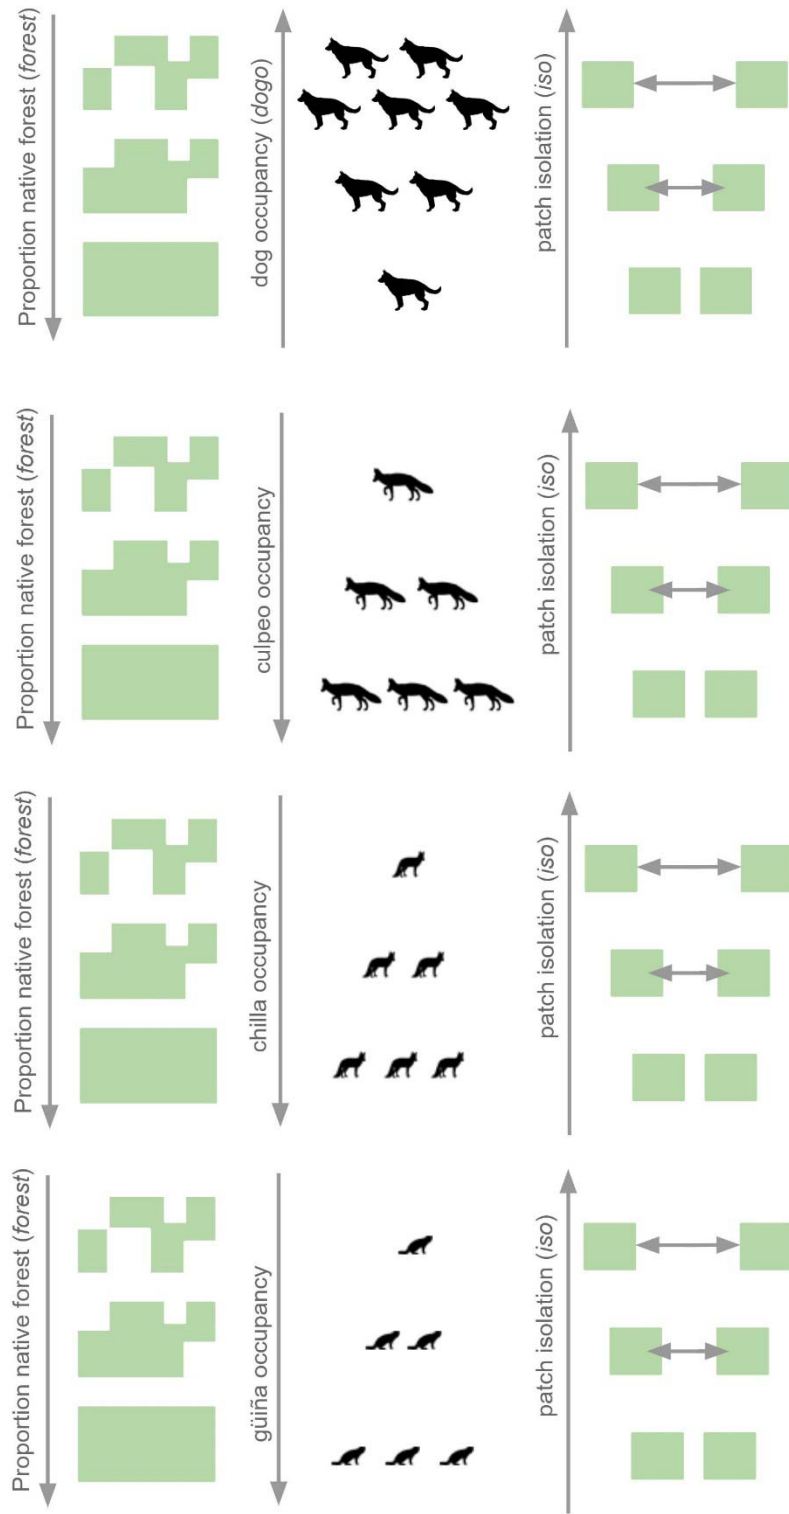

Submitted to Biological Conservation

Figure 3.

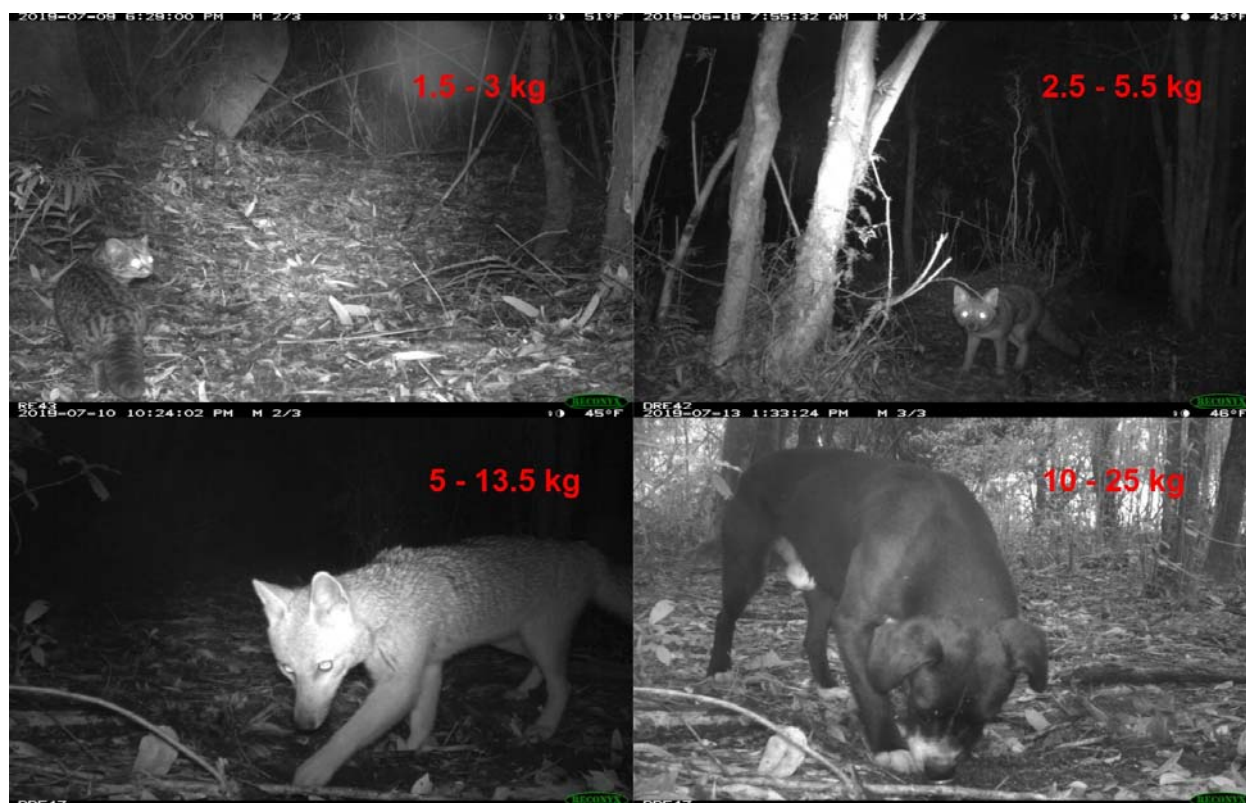

Submitted to Biological Conservation

Figure 4.

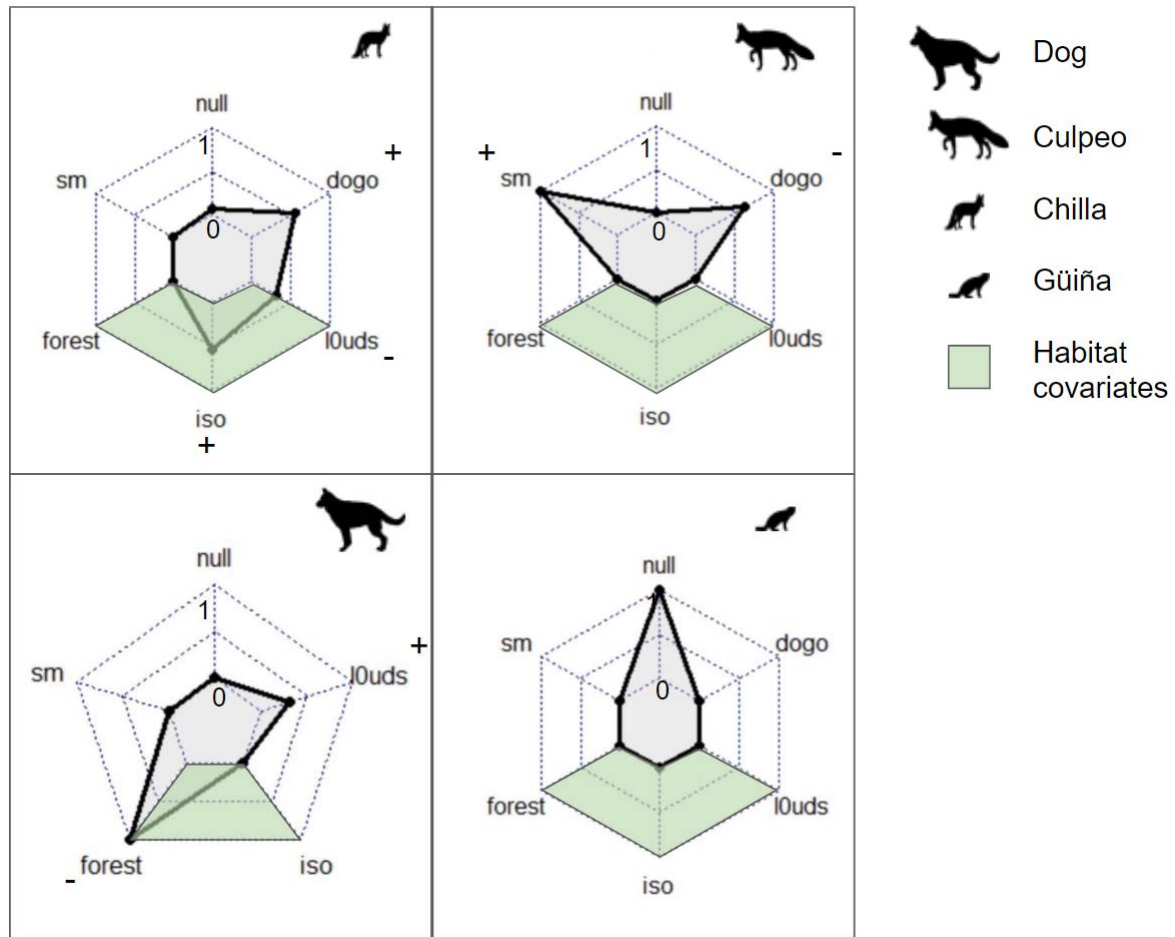

Submitted to Biological Conservation

Table 1. Top occupancy models for every species (occupancy( $\Psi$ ), detection( $p$ )). QAICc was used instead of AICc in model ranking for güiña occupancy to account for overdispersion of the global model.

Table 1.

| Species                              | Top models                                 | AICc                                  | $\Delta$ AICc* | $w_i$ |
|--------------------------------------|--------------------------------------------|---------------------------------------|----------------|-------|
| Chilla                               | p(dogo, 10uds) $\Psi$ (iso)                | 429.809                               | 0              | 0.175 |
|                                      | p(dogo, 10uds, cam) $\Psi$ (iso)           | 430.289                               | 0.480          | 0.138 |
|                                      | p(dogo, 10uds) $\Psi$ (dogo)               | 430.613                               | 0.804          | 0.117 |
|                                      | p(dogo, 10uds) $\Psi$ (dogo, 10uds)        | 430.782                               | 0.974          | 0.108 |
|                                      | p(dogo, 10uds, cam) $\Psi$ (dogo)          | 430.948                               | 1.139          | 0.099 |
|                                      | p(dogo, 10uds) $\Psi$ (iso, dogo)          | 431.139                               | 1.331          | 0.090 |
|                                      | p(dogo, 10uds, cam) $\Psi$ (dogo, 10uds)   | 431.511                               | 1.702          | 0.075 |
|                                      | p(dogo, 10uds) $\Psi$ (iso, 10uds)         | 431.736                               | 1.927          | 0.067 |
|                                      | p(dogo, 10uds) $\Psi$ (~1)                 | 431.738                               | 1.929          | 0.067 |
|                                      | p(dogo, 10uds) $\Psi$ (iso, dogo, 10uds)   | 431.792                               | 1.982          | 0.065 |
|                                      | Culpeo                                     | p(dogo, cam, 10uds) $\Psi$ (dogo, sm) | 124.932        | 0     |
| p(dogo, 10uds) $\Psi$ (dogo, sm)     |                                            | 126.238                               | 1.306          | 0.142 |
| p(dogo, cam, 10uds) $\Psi$ ( sm)     |                                            | 126.280                               | 1.348          | 0.139 |
| p(dogo, cam) $\Psi$ (dogo, sm)       |                                            | 126.598                               | 1.666          | 0.119 |
| p(dogo, trap, 10uds) $\Psi$ (sm)     |                                            | 126.734                               | 1.802          | 0.111 |
| p(dogo, 10uds) $\Psi$ (sm)           |                                            | 126.753                               | 1.821          | 0.110 |
| p(dogo, cam, trap) $\Psi$ (dogo, sm) |                                            | 126.802                               | 1.870          | 0.107 |
| Dog                                  | p(10uds, trap) $\Psi$ (forest)             | 272.000                               | 0              | 0.370 |
|                                      | p(10uds, trap, cam) $\Psi$ (forest)        | 272.306                               | 0.306          | 0.318 |
|                                      | p(10uds, trap) $\Psi$ (forest, 10uds)      | 273.704                               | 1.704          | 0.158 |
|                                      | p(10uds, trap, cam) $\Psi$ (forest, 10uds) | 273.757                               | 1.757          | 0.154 |
| Güiña                                | p(~1) $\Psi$ (~1)                          | 6.830                                 | 0              | 0.101 |

Submitted to Biological Conservation

## Supplementary Material

Figure S1. 24-hour activity patterns of all four study species. Dogs are distinct from native species in having a clearly diurnal activity pattern.

Figure S1.

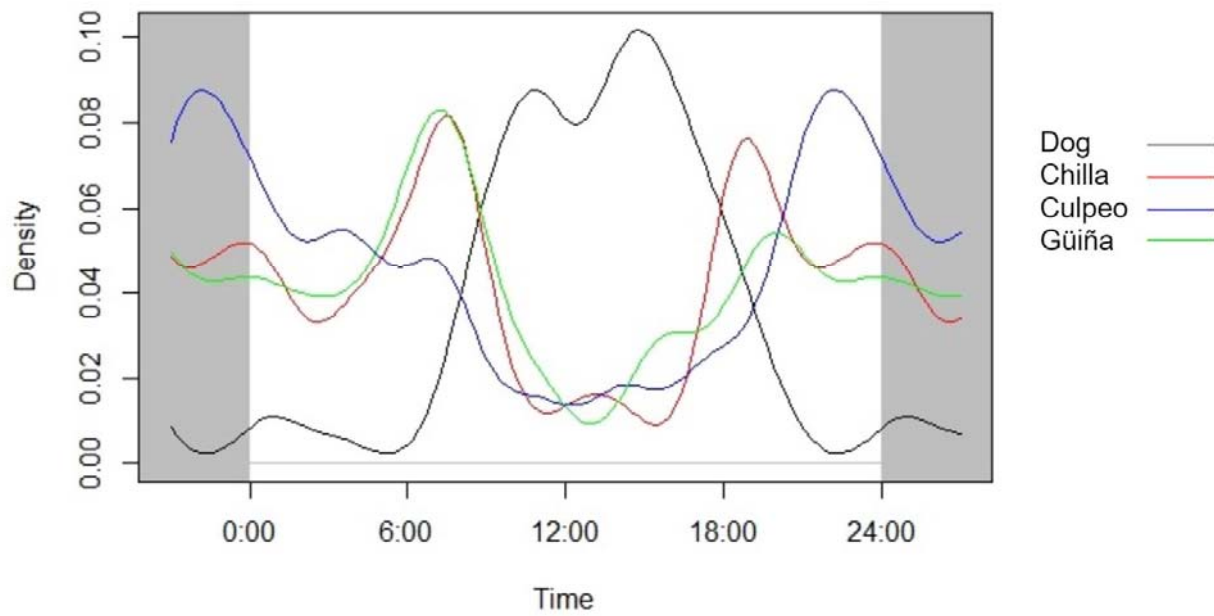

Submitted to Biological Conservation

Figure S2. The effect of a simulated increase in dog occupancy across the landscape on the beta coefficient and 95% confidence interval for the *dogo* covariate in the culpeo occupancy model. \*represents a significant beta coefficient.

Figure S2.

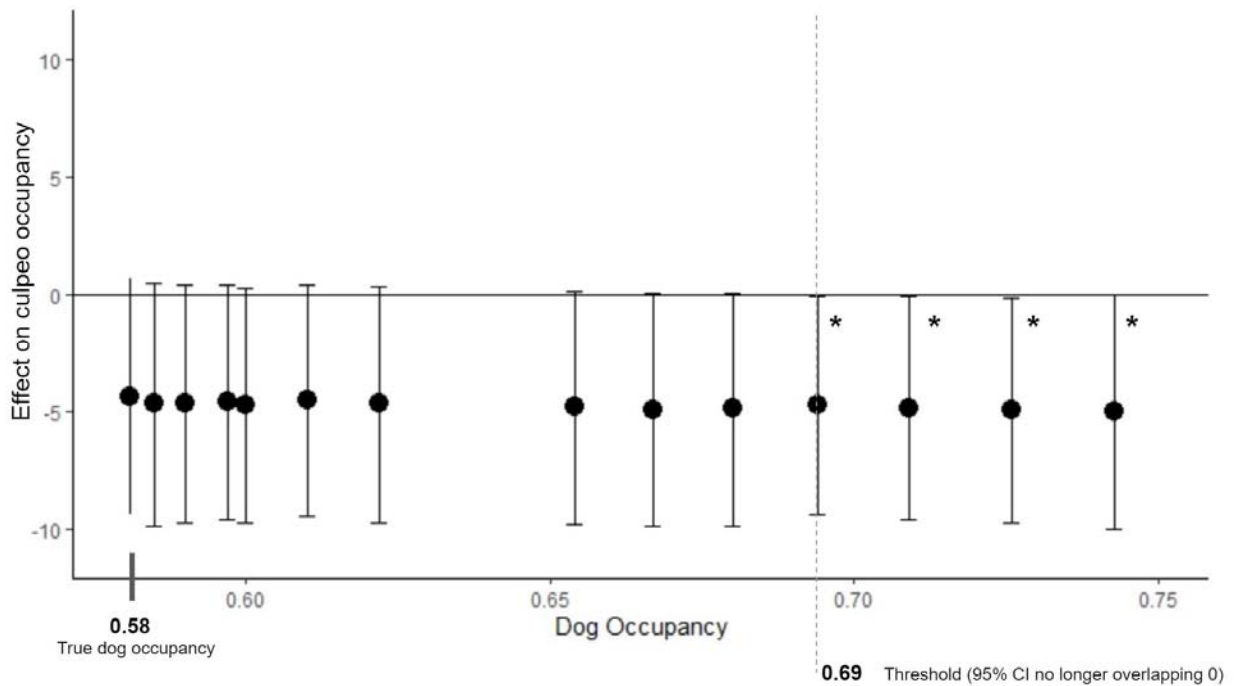

Table S1. Overlap coefficients ( $\Delta$ ) and Mardia-Watson-Wheeler test for homogeneity of means for every pairwise combination of the study species.  $\Delta_4$  was used for every comparison except for those pairs containing the culpeo, where  $\Delta_1$  was used to account for lower number of triggers.

Table S1.

| Comparison    | $\Delta$ Overlap (95% CI) | W statistic | <i>p</i> -value |
|---------------|---------------------------|-------------|-----------------|
| Chilla-Dog    | 0.40 (0.25-0.44)          | 83.62       | <0.001          |
| Culpeo-Dog    | 0.35 (0.22-0.48)          | 42.96       | <0.001          |
| Guigna-Dog    | 0.43 (0.30-0.56)          | 47.84       | 0.001           |
| Chilla-Culpeo | 0.78 (0.66-0.89)          | 5.02        | 0.08            |
| Chilla-Guina  | 0.89 (0.80-0.97)          | 0.47        | 0.79            |
| Guina-Culpeo  | 0.78 (0.75-1.03)          | 4.79        | 0.09            |
